# Supplementary material for: Innovative Fibrous Materials Loaded with 5-Nitro-8-hydroxyquinoline via Electrospinning/Electrospraying Demonstrate Antioxidant, Antimicrobial and Anticancer Activities
Source: MDPI journal article supplement (doi:10.3390/antiox12061243), 2023-06-09
Supplement: s1 [file s1]

## Supplementary Material

### Innovative fibrous materials loaded with 5-nitro-8-hydroxyquinoline by electrospinning/electrospraying with antioxidant, antimicrobial and anticancer activities

Mariya Spasova <sup>1,\*</sup>, Nikoleta Stoyanova <sup>1</sup>, Nasko Nachev <sup>1</sup>, Milena Ignatova<sup>1,\*</sup>, Nevena Manolova <sup>1</sup>, Iliya Rashkov <sup>1</sup>, Ani Georgieva <sup>2</sup>, Reneta Toshkova <sup>2</sup> and Nadya Markova<sup>3</sup>

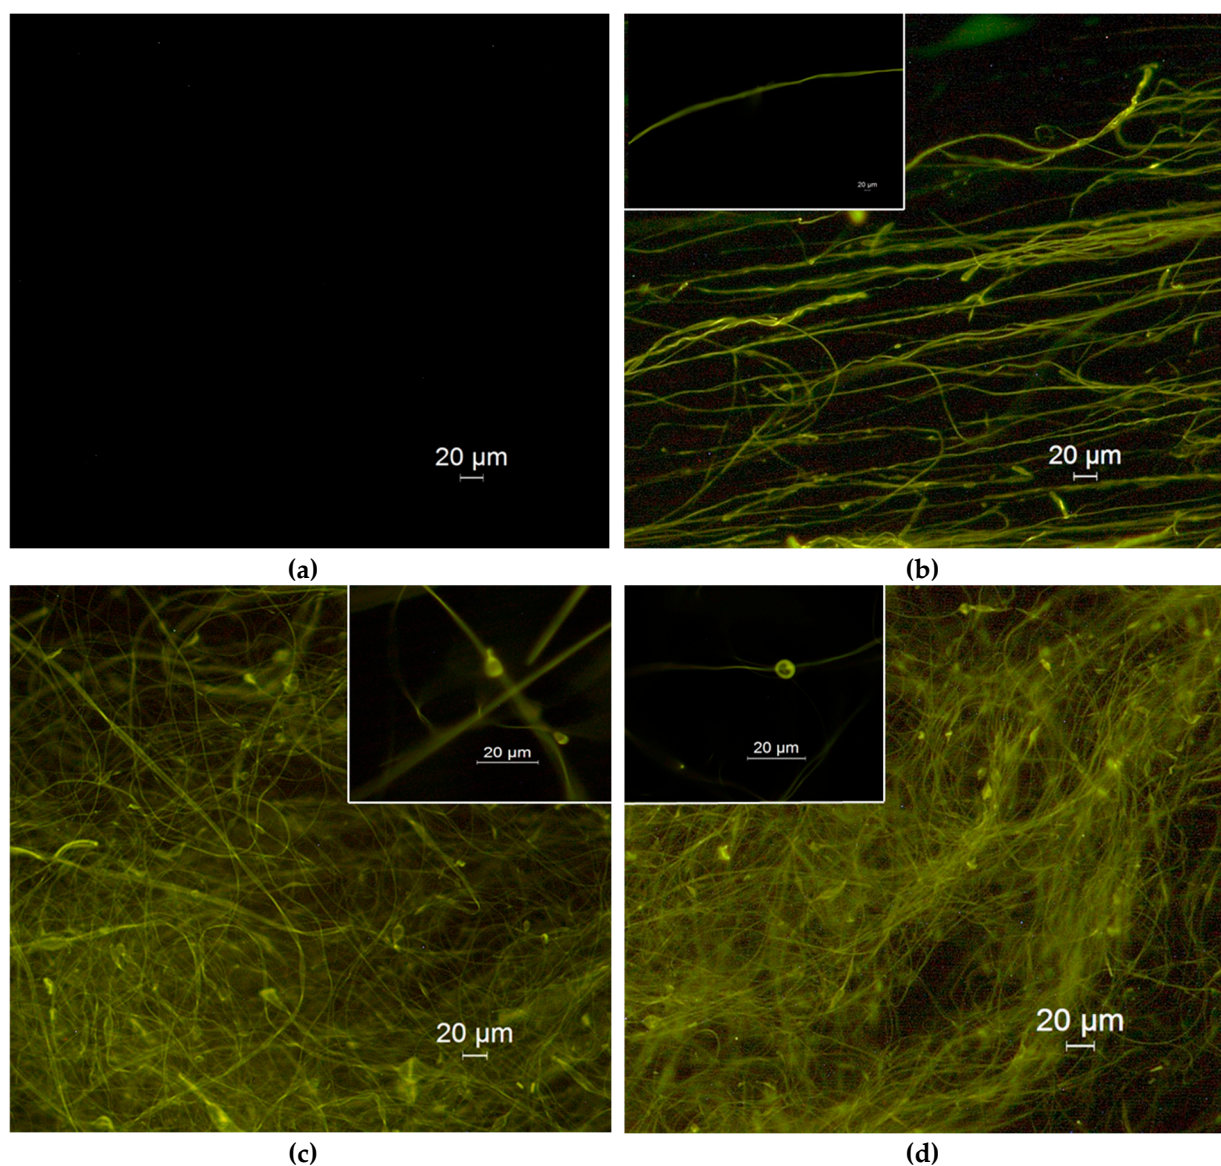

**Figure S1.** Fluorescence microscope images of fibrous materials: (a) CA, (b) 5N-*in*-CA, (c) PVP,5N-*on*-(5N-*in*-CA) and (d) PVA,5N-*on*-(5N-*in*-CA). Bar = 20 μm.

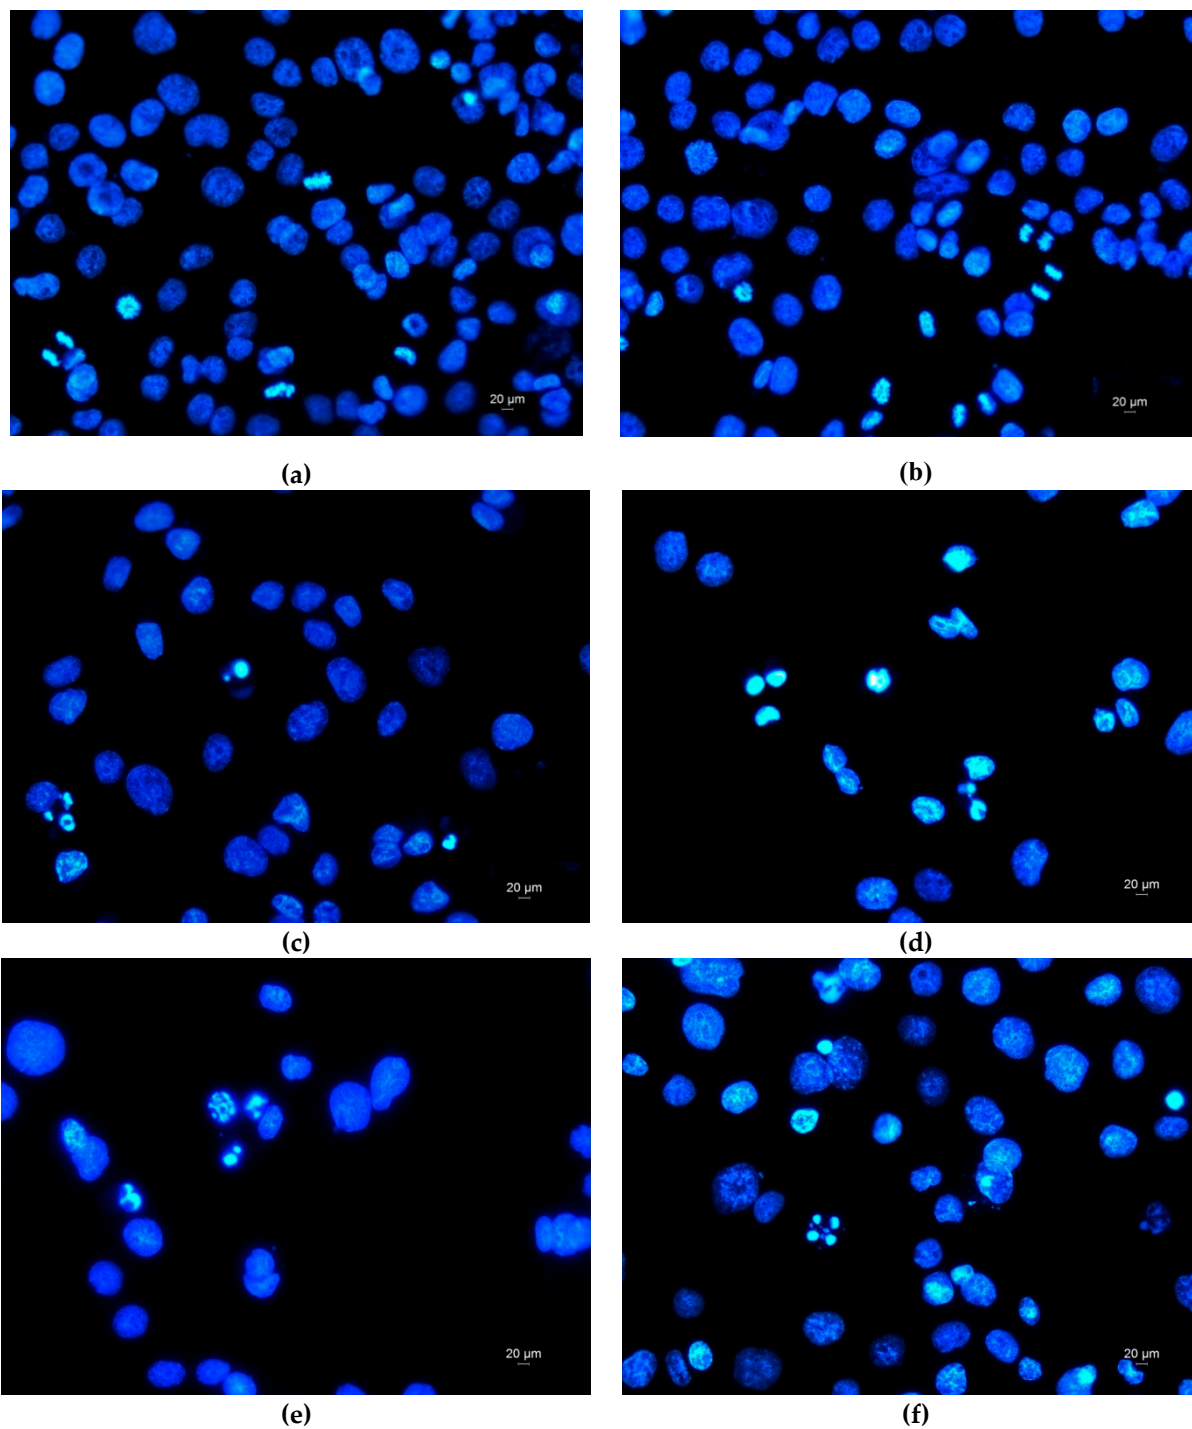

**Figure S2.** Fluorescence microscope images of DAPI stained HeLa cancer cells after treatment with: (a) Untreated HeLa cells; (b) CA fibrous mat; (c) 5N-*in*-CA fibrous mat; (d) PVP,5N-*on*-(5N-*in*-CA) fibrous mat; (e) PVA,5N-*on*-(5N-*in*-CA) fibrous mat; (f) free 5N (20  $\mu$ M/L). Bar = 20  $\mu$ m.

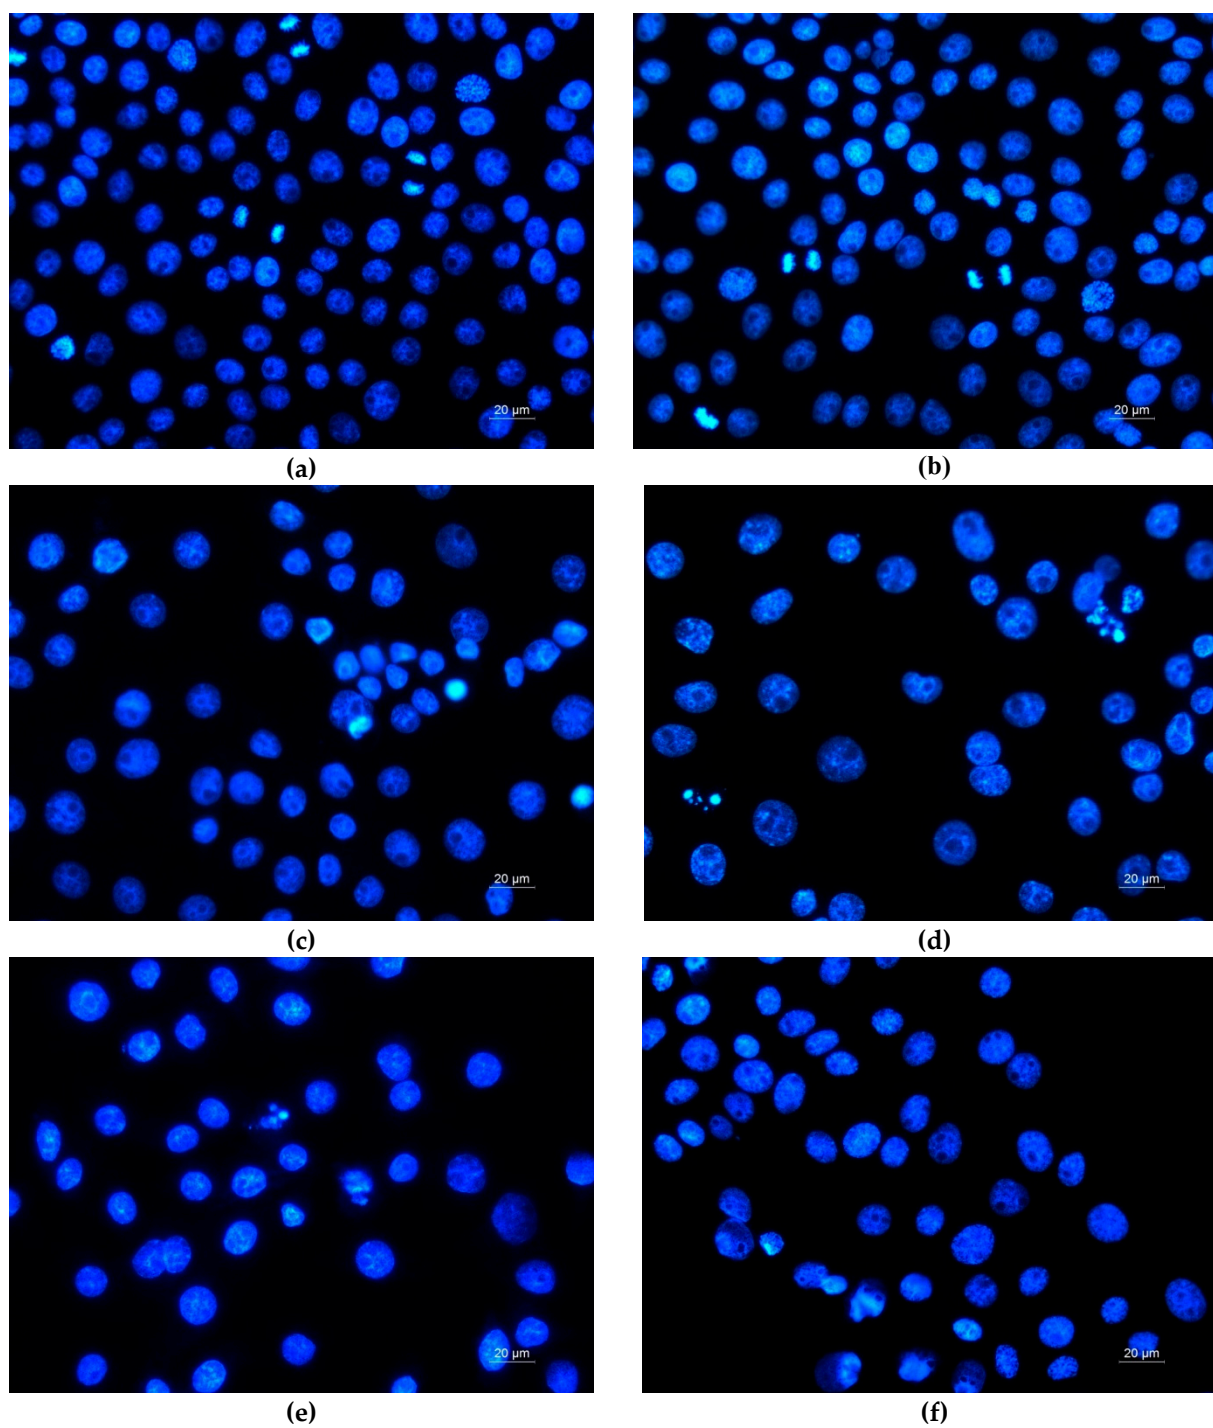

**Figure S3.** Fluorescence microscope images of DAPI stained Balb/c3T3 mouse embryo fibroblasts after treatment with: (a) Untreated Balb/c3T3 cells; (b) CA fibrous mat; (c) 5N-in-CA fibrous mat; (d) PVP,5N-on-(5N-in-CA) fibrous mat; (e) PVA,5N-on-(5N-in-CA) fibrous mat; (f) free 5N (20 μM/L). Bar = 20 μm.
